# Supplementary material for: Early infiltration of p40IL12+CCR7+CD11b+ cells is critical for fibrosis development
Source: PubMed Central journal article supplement (PMC5004285; doi:10.1002/iid3.114), 2016-07-21
Supplement: IID3-4-300-s001.pdf [file IID3-4-300-s001.pdf]

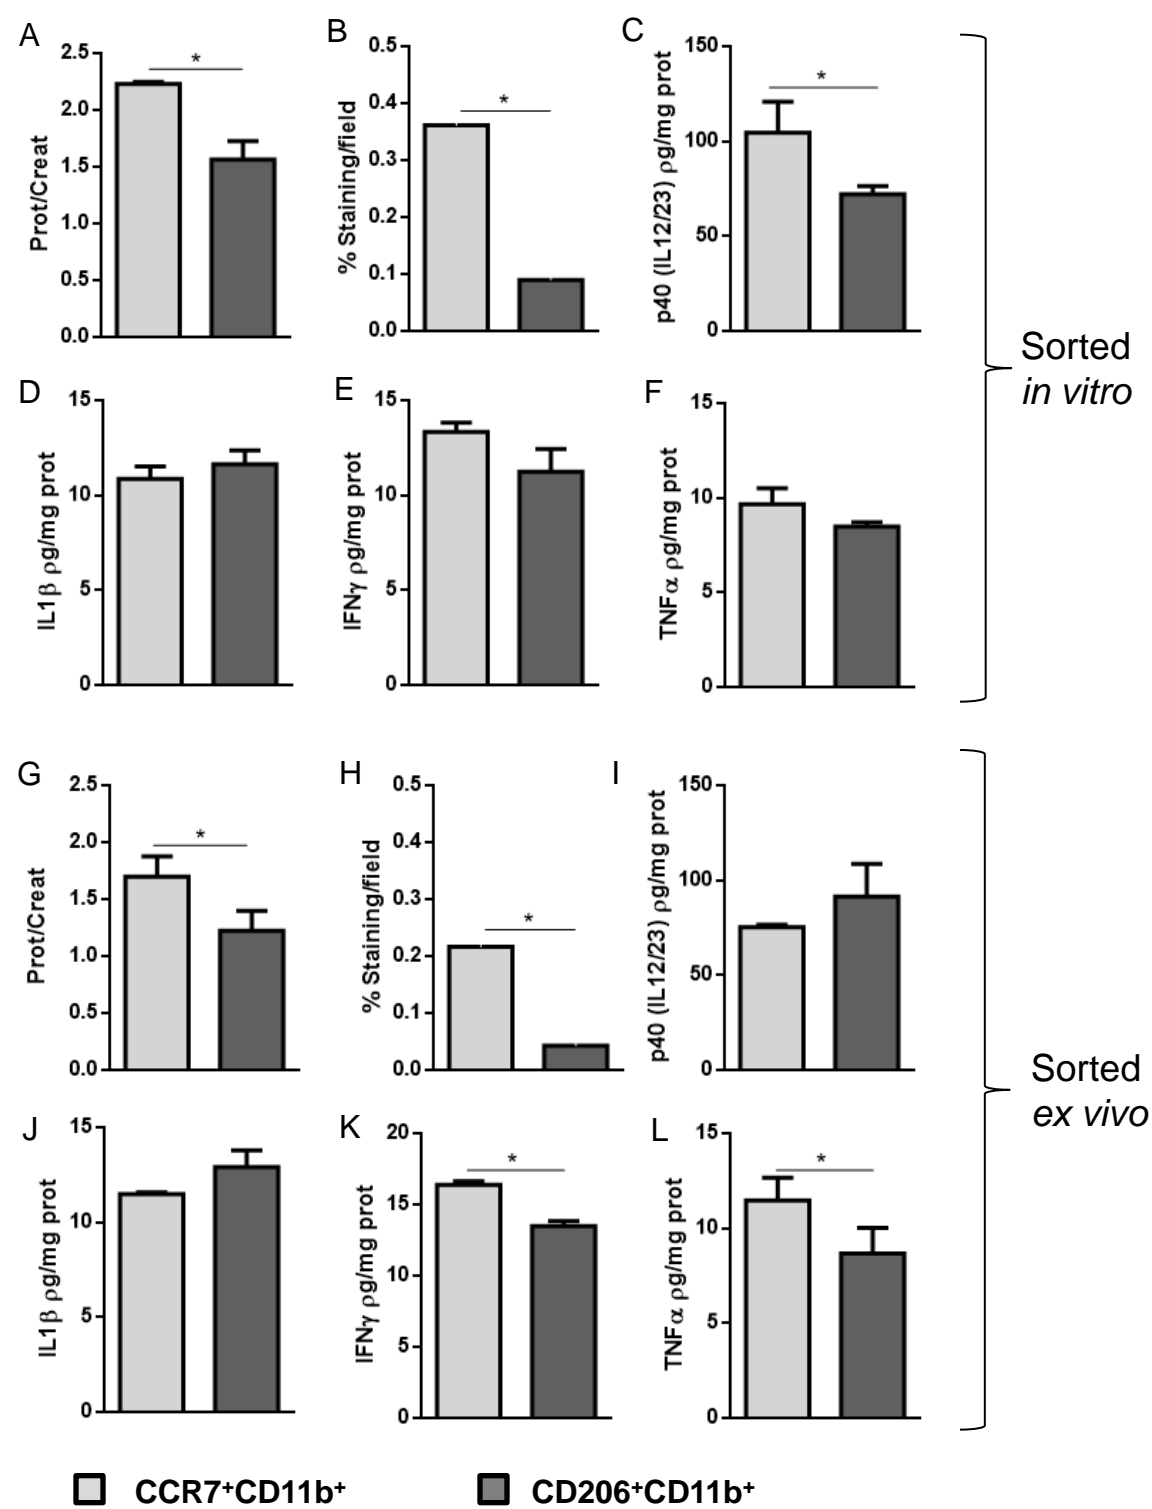

Sup. Fig. 1

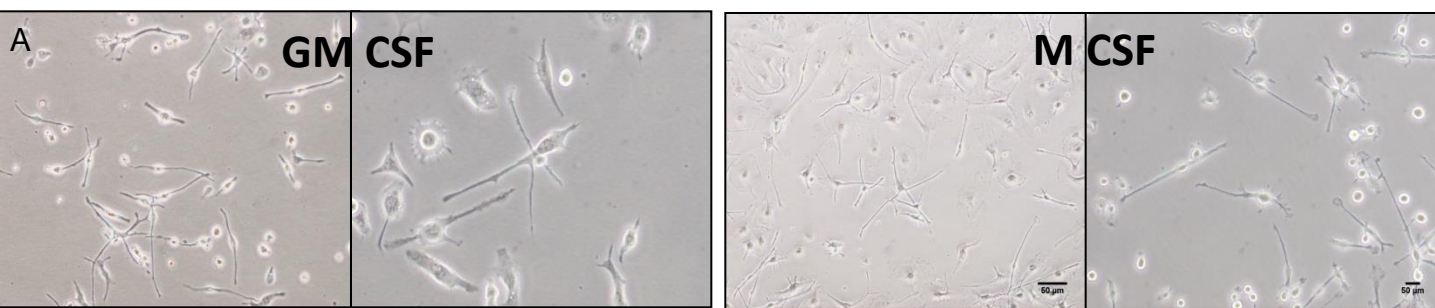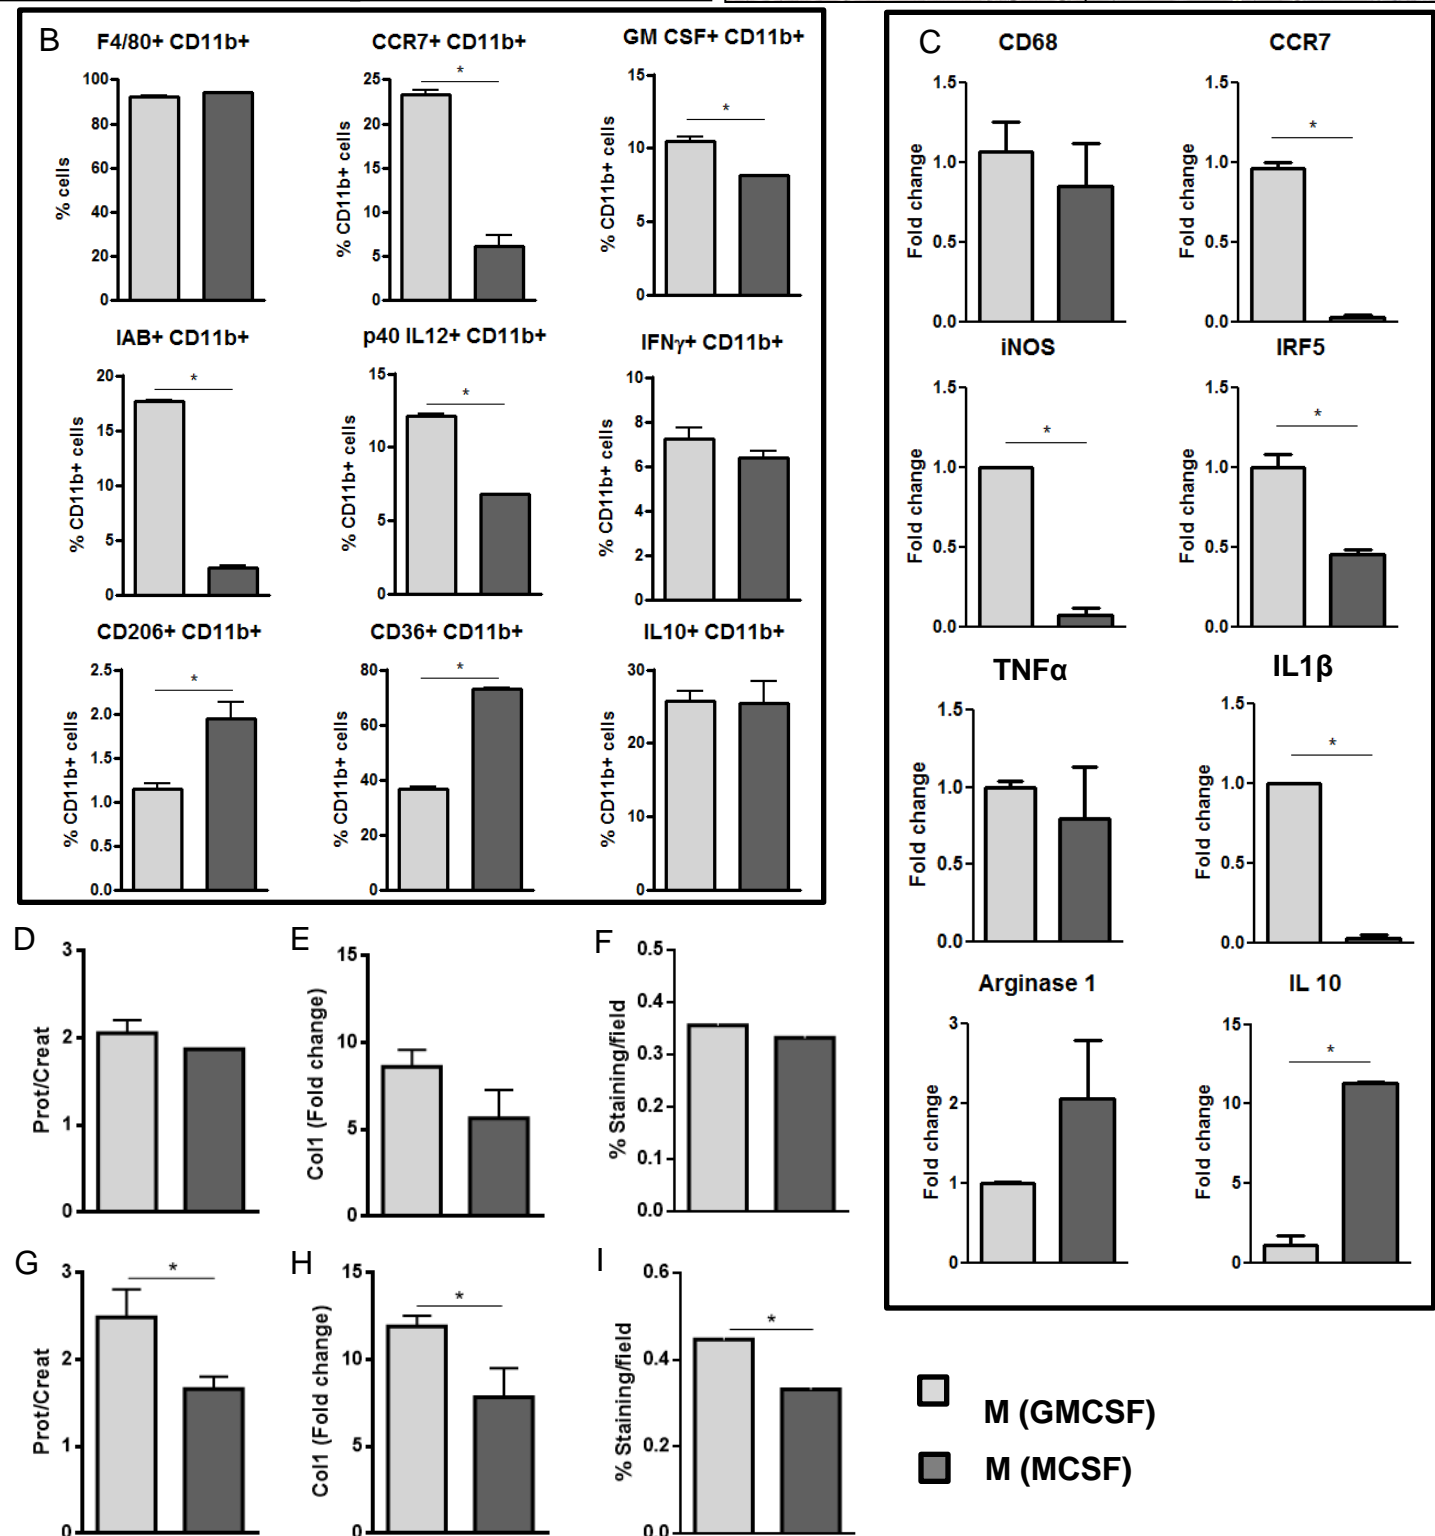

Sup. Fig. 2

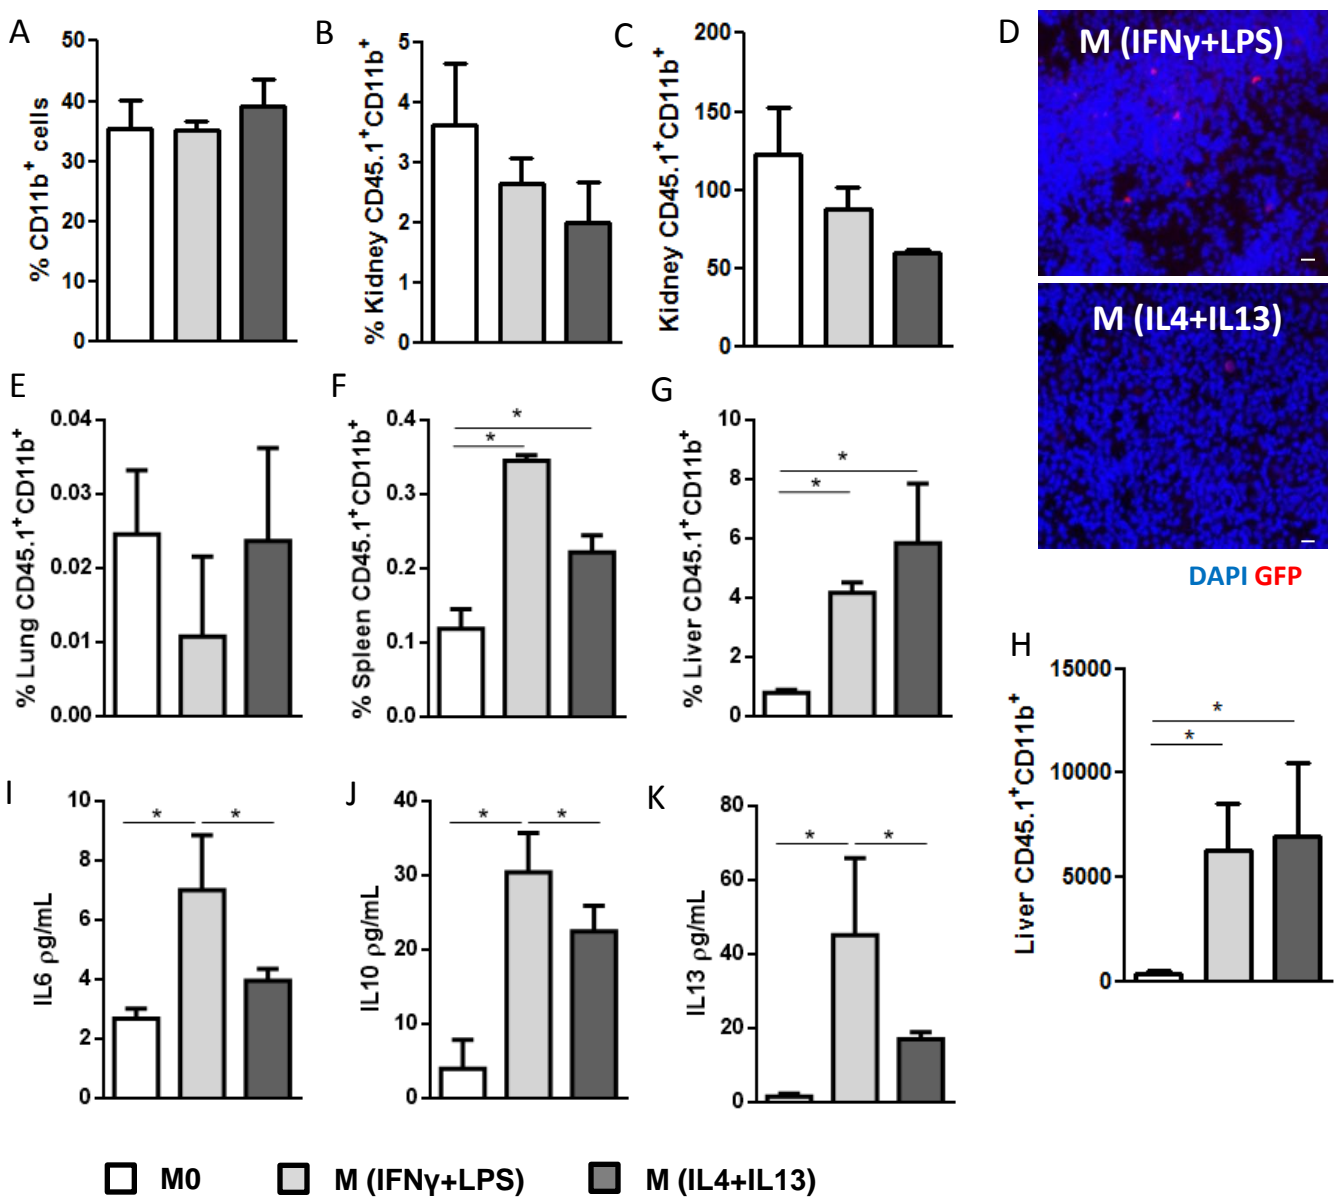

Sup. Fig. 3

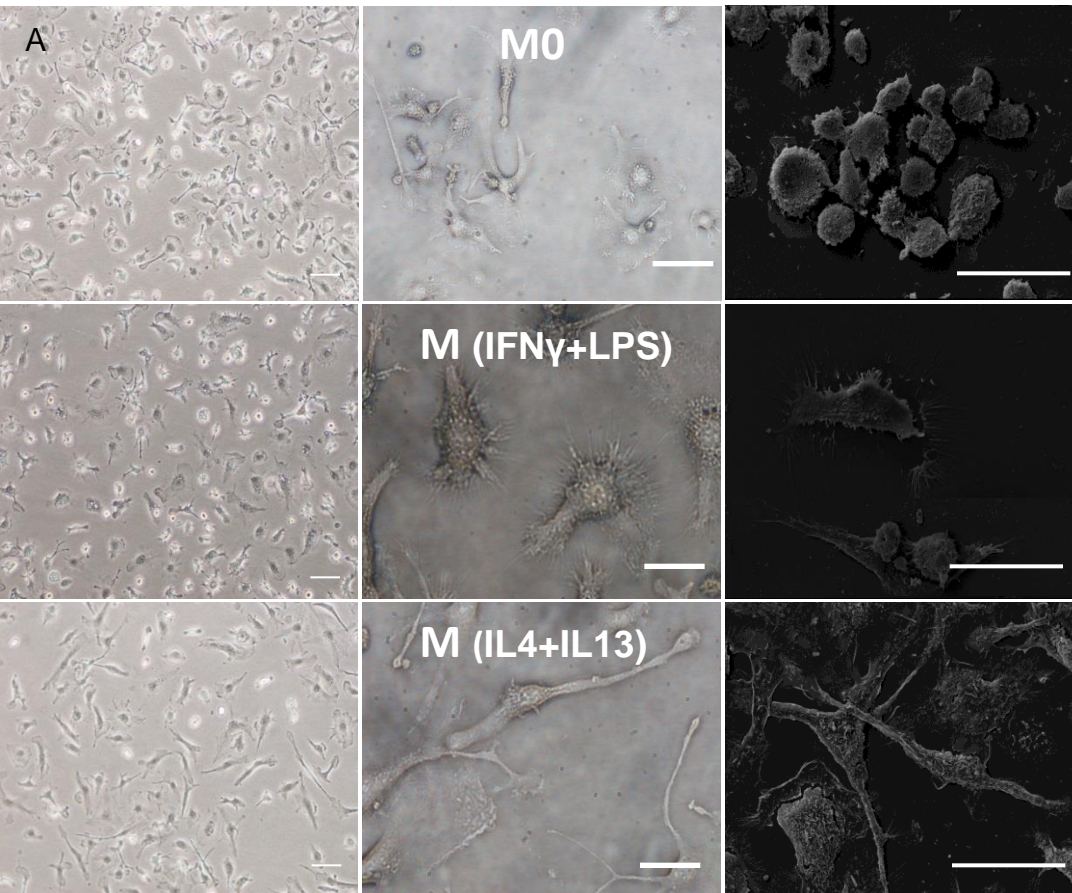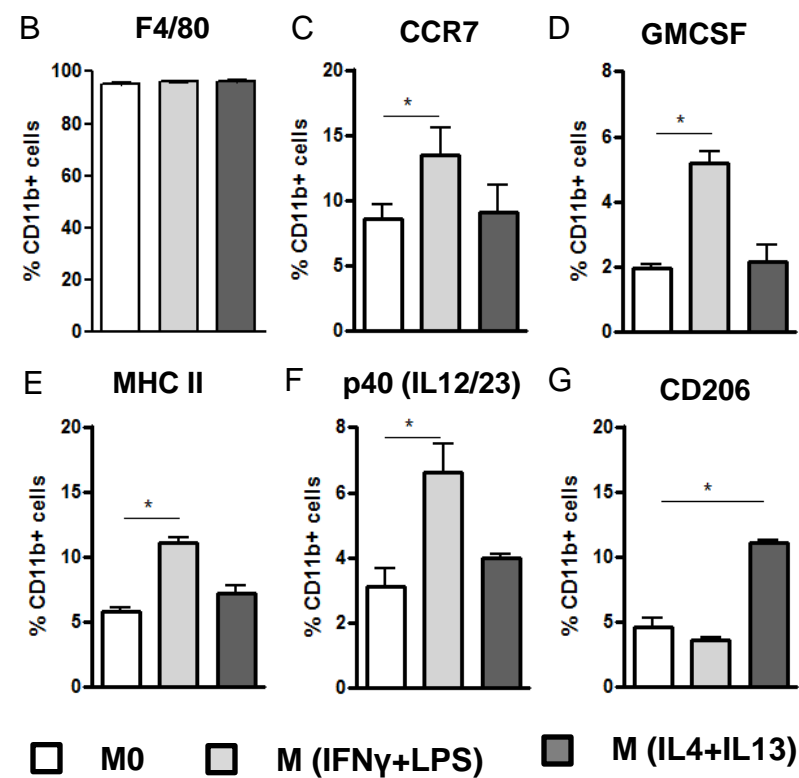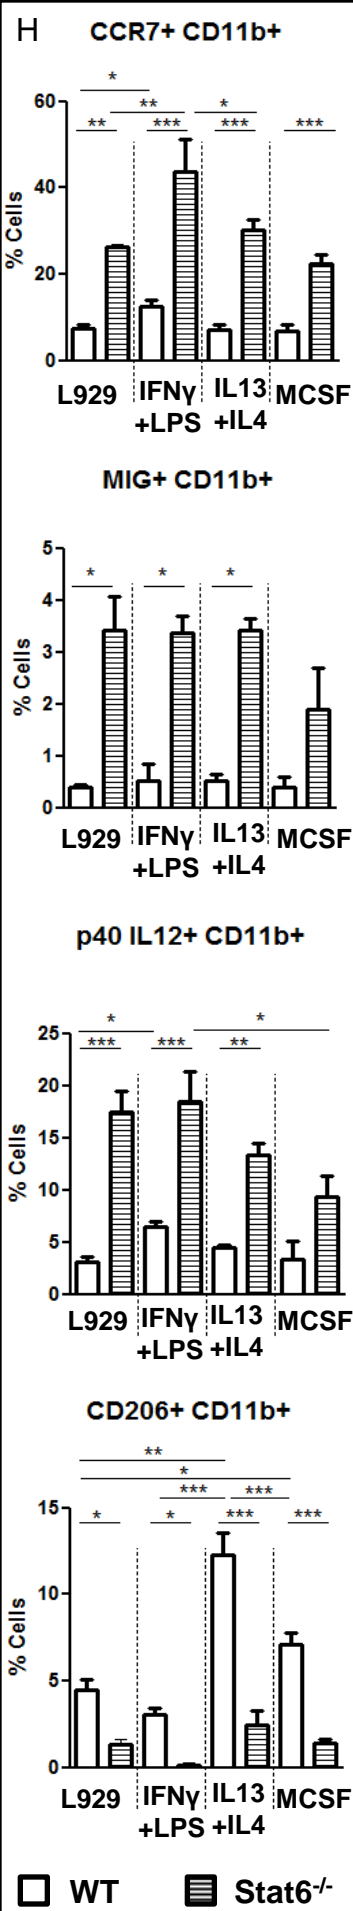

Sup. Fig. 4

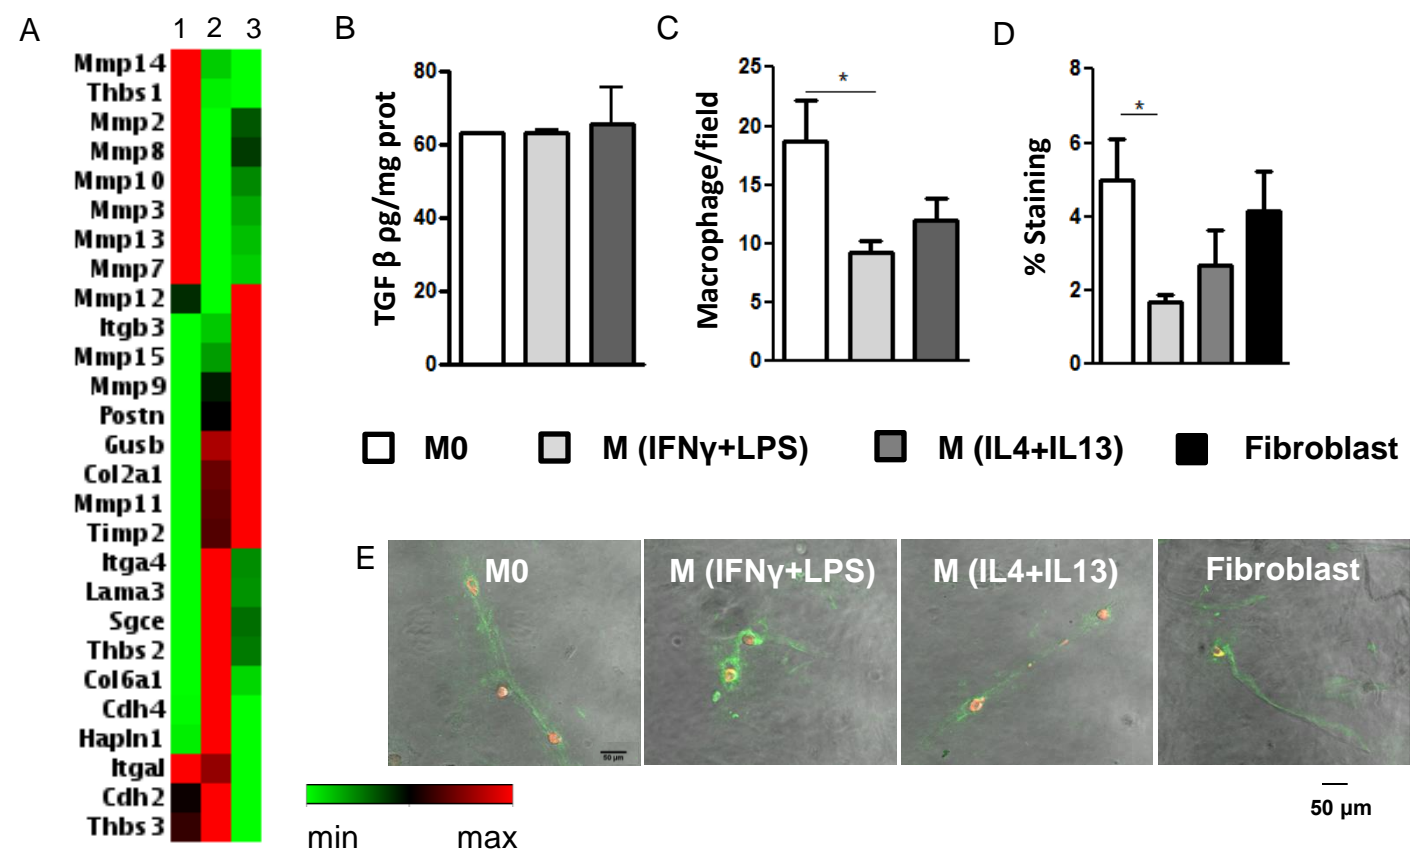

Sup. Fig. 5
